# Supplementary material for: Detection of Androgen Receptor Variant 7 (ARV7) mRNA Levels in EpCAM-Enriched CTC Fractions for Monitoring Response to Androgen Targeting Therapies in Prostate Cancer
Source: Cells. 2019 Sep 11;8(9):1067. doi: 10.3390/cells8091067 (PMC6770695; doi:10.3390/cells8091067)
Supplement: Supplementary file 1 [file cells-08-01067-s001.pdf]

Supplementary Figure S1:

(a)

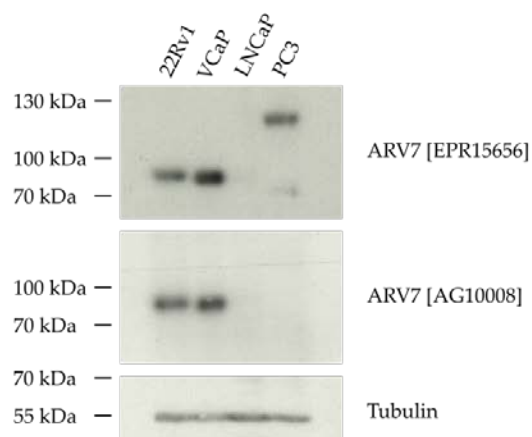

(b)

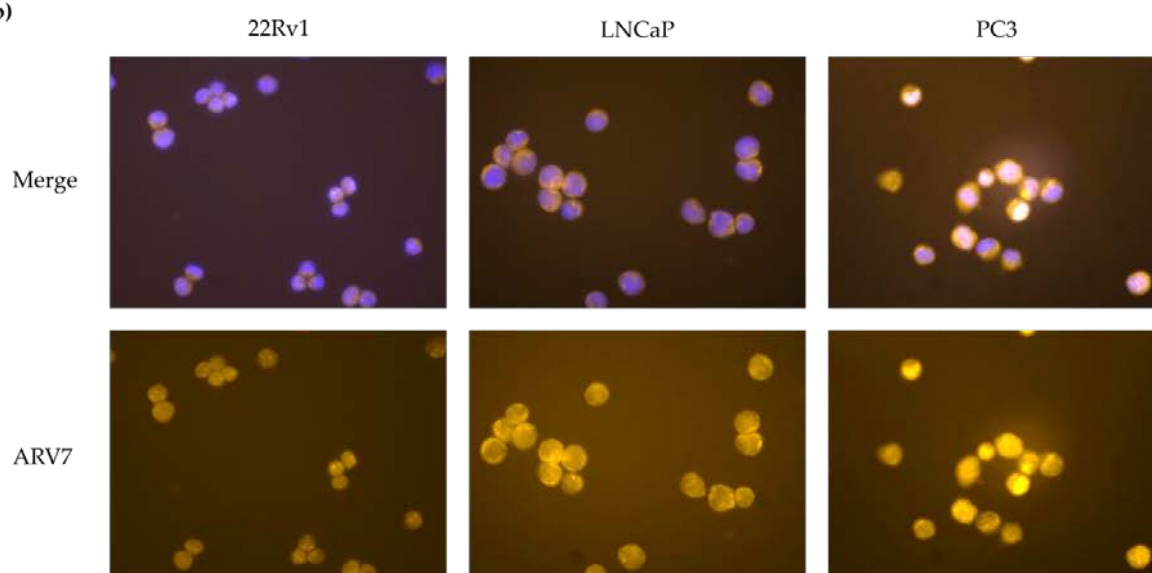

(c)

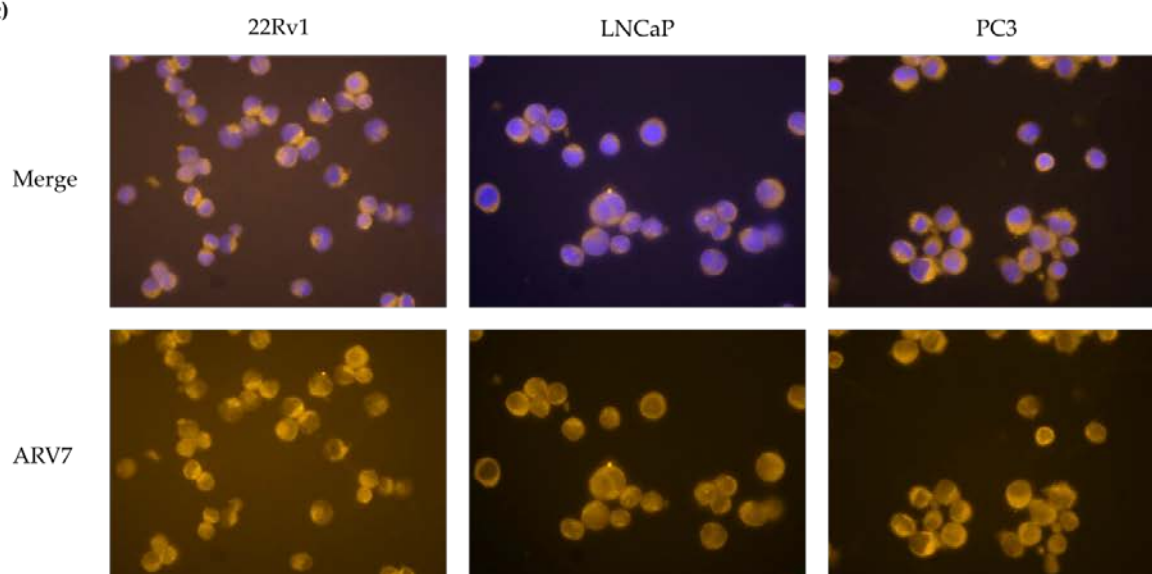

**Figure S1:** Assessment of ARV7 antibody performance on selected prostate cancer cell lines via Western Blot and immunocytochemical (ICC) staining. **(a)** Western Blot analysis of antibodies EPR15656 and AG10008. 40µg of total protein from four prostate cancer cell lines were applied. Tubulin was used as a loading control. **(b)** ICC of ARV7 on three selected prostate cancer cell lines. Upper panel: merged images, lower panel: ARV7 staining. Cells on cytopins are stained using the EPR15656 clone targeting ARV7 with a species specific secondary antibody in red (Alexa 546).. The nucleus is counterstained with DAPI. Pictures are taken at 40x magnification. **(c)** ICC of ARV7 on three selected prostate cancer cell lines. Upper panel: merged images, lower panel: ARV7 staining. Cells on cytopins are stained using the AG10008 clone targeting ARV7 with a species specific secondary antibody in red (Alexa 546). The nucleus is counterstained with DAPI. Pictures are taken at 40x magnification. Both **(b)** and **(c)** show unspecific staining results for each ARV7-targeting antibody respectively. Especially for clone EPR15656 **(b)** nuclear staining in ARV7<sup>-</sup> PC3 cells appears to be more intense than for ARV7<sup>+</sup> 22Rv1 cells.

**Table S1:** Clinical data of 26 mPCa patients. Non-available data indicated as “n.a.”.

1 = yes

0 = no

| Patient Cohort                       |                   |                  |         |                  |                     |                   |                 |                      |                |         |               |                  |         |         |               |                |         |         |                |              |                  |         |                  |                  |               |              |         |
|--------------------------------------|-------------------|------------------|---------|------------------|---------------------|-------------------|-----------------|----------------------|----------------|---------|---------------|------------------|---------|---------|---------------|----------------|---------|---------|----------------|--------------|------------------|---------|------------------|------------------|---------------|--------------|---------|
| Patient Characteristics              | Al Patient s      | UK E-1           | UK E-2  | UK E-3           | UK E-4              | UK E-5            | UK E-6          | UK E-7               | UKE-8          | UK E-9  | UK E-10       | UK E-11          | UK E-12 | UK E-13 | UK E-14       | UKE-15         | UK E-16 | UK E-17 | UK E-18        | UKE-19       | UK E-20          | UK E-21 | UK E-22          | UKE-23           | UK E-24       | UK E-25      | UK E-26 |
| Unique number of patients            | 26                | 1                | 1       | 1                | 1                   | 1                 | 1               | 1                    | 1              | 1       | 1             | 1                | 1       | 1       | 1             | 1              | 1       | 1       | 1              | 1            | 1                | 1       | 1                | 1                | 1             | 1            | 1       |
| Age upon blood draw [years]          | 68                | 76               | 78      | 65               | 77                  | 58                | 71              | 59                   | 70             | 78      | 70            | 67               | 73      | 60      | 73            | 74             | 42      | 59      | 73             | 74           | 66               | 65      | 69               | 76               | 65            | 64           | 70      |
| Primary treatment, Number (%)        |                   |                  |         |                  |                     |                   |                 |                      |                |         |               |                  |         |         |               |                |         |         |                |              |                  |         |                  |                  |               |              |         |
| Prostatectomy (surgery)              | 10                | 0                | 0       | 0                | 0                   | 1                 | 0               | 1                    | 1              | 1       | 1             | 0                | 0       | 0       | 1             | 0              | 0       | 0       | 1              | 1            | 1                | 0       | 0                | 0                | 1             | 0            |         |
| Radiation                            | 6                 | 1                | 0       | 0                | 1                   | 0                 | 0               | 0                    | 1              | 0       | 0             | 0                | 1       | 0       | 1             | 0              | 0       | 1       | 0              | 1            | 0                | 0       | 0                | 0                | 0             | 0            | 1       |
| None                                 | 3                 | 0                | 0       | 1                | 0                   | 0                 | 0               | 0                    | 0              | 0       | 0             | 0                | 0       | 0       | 0             | 0              | 1       | 0       | 1              | 0            | 0                | 0       | 1                | 0                | 0             | 0            | 0       |
| Tumor stage at diagnosis, Number (%) |                   |                  |         |                  |                     |                   |                 |                      |                |         |               |                  |         |         |               |                |         |         |                |              |                  |         |                  |                  |               |              |         |
| actual number                        | cT3 pN0 Gl5 +5 M1 | cT3 NX M1 Gl4 +5 | n . a . | cT3 N1 Gl 4+5 M0 | pT3 bp N1 M1 Gl4 +5 | cT1 bGl 4+5 Nx M1 | pT3 b pN1 R1 M0 | Pt2c pN1 MoR o L1V 0 | pT2c, N0 , M 0 | n . a . | PT 3a , p N 0 | cT3 M1 NX Gl 4+5 | M 1     | T 2 a   | pT3a N0 R0 29 | ypT1 b N X M 1 | T 4     | n . a . | PT 3b, pN1, R1 | P 3b , p N 1 | pT4 pN1M1 Gl 4+5 | n . a . | cT 3N M1 Gl. 4+5 | cT3 NX M1 Gl5 +4 | pT3a R1 p N 1 | T 1c N 0 M 0 |         |

|                                                                         |    |   |   |   |   |   |   |   |   |   |   |   |   |   |   |   |   |   |   |   |   |   |   |   |   |   |  |
|-------------------------------------------------------------------------|----|---|---|---|---|---|---|---|---|---|---|---|---|---|---|---|---|---|---|---|---|---|---|---|---|---|--|
| T1/T2                                                                   | 5  | 0 | 0 | 0 | 0 | 0 | 1 | 0 | 1 | 1 | 0 | 0 | 0 | 0 | 1 | 0 | 1 | 0 | 0 | 0 | 0 | 0 | 0 | 0 | 0 | 1 |  |
| T3/T4                                                                   | 11 | 1 | 1 | 0 | 1 | 1 | 0 | 1 | 0 | 0 | 0 | 1 | 1 | 0 | 0 | 1 | 0 | 1 | 0 | 1 | 1 | 1 | 0 | 1 | 1 | 0 |  |
| Gleason sum<br>at diagnosis,<br>Number (%)                              |    |   |   |   |   |   |   |   |   |   |   |   |   |   |   |   |   |   |   |   |   |   |   |   |   |   |  |
| ≤7                                                                      | 7  | 0 | 0 | 0 | 0 | 0 | 0 | 0 | 1 | 1 | 1 | 0 | 0 | 0 | 1 | 0 | 1 | 0 | 1 | 0 | 0 | 0 | 0 | 0 | 0 | 1 |  |
| ≥8                                                                      | 12 | 1 | 1 | 1 | 1 | 1 | 1 | 1 | 0 | 0 | 0 | 1 | 1 | 1 | 0 | 0 | 0 | 1 | 0 | 1 | 1 | 1 | 1 | 1 | 1 | 0 |  |
| unknown                                                                 | 1  | 0 | 0 | 0 | 0 | 0 | 0 | 0 | 0 | 0 | 0 | 0 | 0 | 0 | 0 | 1 | 0 | 0 | 0 | 0 | 0 | 0 | 0 | 0 | 0 | 0 |  |
| Samples<br>Characteristics                                              |    |   |   |   |   |   |   |   |   |   |   |   |   |   |   |   |   |   |   |   |   |   |   |   |   |   |  |
| Prior to<br>blood<br>collection,<br>use of<br>abiraterone               |    |   |   |   |   |   |   |   |   |   |   |   |   |   |   |   |   |   |   |   |   |   |   |   |   |   |  |
| Yes                                                                     | 5  | 0 | 0 | 0 | 0 | 0 | 0 | 0 | 1 | 0 | 1 | 0 | 0 | 0 | 0 | 0 | 0 | 1 | 0 | 0 | 0 | 0 | 0 | 0 | 1 | 0 |  |
| No                                                                      | 15 | 1 | 1 | 1 | 1 | 1 | 1 | 1 | 0 | 1 | 0 | 1 | 1 | 1 | 1 | 1 | 1 | 1 | 0 | 1 | 1 | 1 | 1 | 1 | 0 | 1 |  |
| Prior to<br>blood<br>collection,<br>use of<br>enzalutamide              |    |   |   |   |   |   |   |   |   |   |   |   |   |   |   |   |   |   |   |   |   |   |   |   |   |   |  |
| Yes                                                                     | 5  | 1 | 0 | 0 | 0 | 0 | 0 | 0 | 0 | 0 | 0 | 0 | 0 | 0 | 0 | 0 | 0 | 1 | 0 | 0 | 0 | 0 | 1 | 0 | 1 | 1 |  |
| No                                                                      | 15 | 0 | 1 | 1 | 1 | 1 | 1 | 1 | 1 | 1 | 1 | 1 | 1 | 1 | 1 | 1 | 1 | 0 | 1 | 1 | 1 | 0 | 1 | 0 | 0 | 0 |  |
| Prior to<br>blood<br>collection,<br>use of<br>Docetaxel<br>Chemotherapy |    |   |   |   |   |   |   |   |   |   |   |   |   |   |   |   |   |   |   |   |   |   |   |   |   |   |  |
| Yes                                                                     | 10 | 1 | 0 | 0 | 0 | 0 | 1 | 0 | 1 | 0 | 1 | 0 | 0 | 1 | 0 | 0 | 1 | 0 | 1 | 0 | 0 | 0 | 1 | 1 | 1 | 1 |  |
| No                                                                      | 10 | 0 | 1 | 1 | 1 | 1 | 0 | 1 | 0 | 1 | 0 | 1 | 1 | 0 | 1 | 1 | 0 | 1 | 0 | 1 | 1 | 1 | 0 | 0 | 0 | 0 |  |
| Prior to<br>blood                                                       |    |   |   |   |   |   |   |   |   |   |   |   |   |   |   |   |   |   |   |   |   |   |   |   |   |   |  |

|                                                                 |                     |          |      |              |           |           |           |          |      |          |        |          |   |              |              |           |     |        |             |     |          |      |              |           |           |         |         |
|-----------------------------------------------------------------|---------------------|----------|------|--------------|-----------|-----------|-----------|----------|------|----------|--------|----------|---|--------------|--------------|-----------|-----|--------|-------------|-----|----------|------|--------------|-----------|-----------|---------|---------|
| collection,<br>use of<br>Cabazitaxel<br>Chemothera<br>py        |                     |          |      |              |           |           |           |          |      |          |        |          |   |              |              |           |     |        |             |     |          |      |              |           |           |         |         |
| Yes                                                             | 3                   | 0        | 0    | 0            | 0         | 0         | 0         | 0        | 0    | 0        | 0      | 0        | 0 | 0            | 0            | 0         | 0   | 0      | 0           | 0   | 0        | 0    | 1            | 0         | 0         | 1       | 1       |
| No                                                              | 17                  | 1        | 1    | 1            | 1         | 1         | 1         | 1        | 1    | 1        | 1      | 1        | 1 | 1            | 1            | 1         | 1   | 1      | 1           | 1   | 1        | 1    | 0            | 1         | 1         | 0       | 0       |
| Threatment<br>line before<br>blood<br>collection,<br>Number (%) |                     |          |      |              |           |           |           |          |      |          |        |          |   |              |              |           |     |        |             |     |          |      |              |           |           |         |         |
| First line                                                      | 12                  | 0        | 1    | 1            | 0         | 0         | 0         | 1        | 1    | 1        | 1      | 1        | 0 | 1            | 1            | 1         | 1   | 1      | 0           | 1   | 1        | 0    | 0            | 0         | 0         | 0       | 0       |
| Second line                                                     | 3                   | 0        | 0    | 0            | 1         | 1         | 1         | 0        | 0    | 0        | 0      | 0        | 1 | 0            | 0            | 0         | 0   | 0      | 0           | 0   | 0        | 1    | 0            | 1         | 0         | 0       | 0       |
| Third line or<br>later                                          | 5                   | 1        | 0    | 0            | 0         | 0         | 0         | 0        | 0    | 0        | 0      | 0        | 0 | 0            | 0            | 0         | 0   | 0      | 1           | 0   | 0        | 0    | 1            | 0         | 1         | 1       | 1       |
| Metastatic<br>disease,<br>Number (%)                            |                     |          |      |              |           |           |           |          |      |          |        |          |   |              |              |           |     |        |             |     |          |      |              |           |           |         |         |
| Bone                                                            | 20                  | 1        | 1    | 1            | 0         | 1         | 1         | 1        | 1    | 1        | 1      | 1        | 1 | 1            | 1            | 1         | 1   | 1      | 1           | 1   | 1        | 1    | 1            | 1         | 1         | 1       | 1       |
| liver                                                           | 1                   | 0        | 0    | 0            | 0         | 0         | 0         | 0        | 0    | 0        | 0      | 0        | 0 | 0            | 0            | 0         | 0   | 0      | 0           | 0   | 0        | 0    | 1            | 0         | 0         | 0       | 0       |
| Lymph node                                                      | 10                  | 1        | 0    | 0            | 1         | 1         | 0         | 0        | 1    | 1        | 0      | 0        | 0 | 0            | 1            | 0         | 1   | 1      | 0           | 0   | 1        | 1    | 1            | 0         | 0         | 1       | 1       |
| Other                                                           | 2                   | 1        | 0    | 0            | 0         | 0         | 0         | 0        | 0    | 0        | 0      | 0        | 0 | 0            | 0            | 0         | 0   | 1      | 0           | 0   | 0        | 0    | 0            | 0         | 0         | 1       | 0       |
| None                                                            | 0                   | 0        | 0    | 0            | 0         | 0         | 0         | 0        | 0    | 0        | 0      | 0        | 0 | 0            | 0            | 0         | 0   | 0      | 0           | 0   | 0        | 0    | 0            | 0         | 0         | 0       | 0       |
| unknown                                                         | 0                   | 0        | 0    | 0            | 0         | 0         | 0         | 0        | 0    | 0        | 0      | 0        | 0 | 0            | 0            | 0         | 0   | 0      | 0           | 0   | 0        | 0    | 0            | 0         | 0         | 0       | 0       |
| Laboratory<br>measures,<br>median<br>(range)                    |                     |          |      |              |           |           |           |          |      |          |        |          |   |              |              |           |     |        |             |     |          |      |              |           |           |         |         |
| 0                                                               |                     |          |      |              |           |           |           |          |      |          |        |          |   |              |              |           |     |        |             |     |          |      |              |           |           |         |         |
| PSA (at time<br>of blood<br>draw)                               | 21<br>53<br>.7<br>2 | 110<br>6 | 0.02 | 3<br>.0<br>2 | 12.2<br>7 | 31.2<br>4 | 50.<br>83 | 9.5<br>1 | 74.1 | 10.<br>8 | 7<br>5 | 2.<br>87 | 0 | 6<br>8.<br>3 | 3<br>0.<br>1 | 52.<br>23 | 1.9 | 1<br>3 | 5<br>7<br>1 | 5.4 | 16<br>.3 | 11.5 | 7.<br>8<br>1 | 54.<br>77 | 86.<br>13 | 11<br>1 | 95<br>2 |

| <b>Present<br/>status (July<br/>2019)</b> |   |   |   |   |   |   |   |   |   |   |   |   |   |   |   |   |   |   |   |   |   |   |   |   |   |   |   |
|-------------------------------------------|---|---|---|---|---|---|---|---|---|---|---|---|---|---|---|---|---|---|---|---|---|---|---|---|---|---|---|
| Alive                                     | 4 | 0 | 0 | 1 | 1 | 0 | 1 | 1 | 0 | 0 | 0 | 0 | 0 | 1 | 0 | 0 | 1 | 0 | 0 | 0 | 0 | 0 | 0 | 1 | 0 | 0 | 0 |
| Deceased                                  | 9 | 1 | 1 | 0 | 0 | 1 | 0 | 0 | 0 | 1 | 0 | 0 | 1 | 0 | 0 | 0 | 0 | 0 | 1 | 1 | 0 | 1 | 1 | 0 | 1 | 1 | 1 |
| Unknown                                   | 7 | 0 | 0 | 0 | 0 | 0 | 0 | 0 | 1 | 0 | 1 | 1 | 0 | 0 | 1 | 1 | 0 | 1 | 0 | 0 | 1 | 0 | 0 | 0 | 0 | 0 | 0 |
